# Supplementary material for: Ty1 retrovirus-like element Gag contains overlapping restriction factor and nucleic acid chaperone functions
Source: PubMed Central journal article supplement — Nucleic Acids Res. 2015 Jul 8;43(15):7414–31. doi: 10.1093/nar/gkv695 (PMC4551931; doi:10.1093/nar/gkv695), 2015-07-08
Supplement: supp_gkv695_nar-01268-v-2015-File011.pdf [file supp_gkv695_nar-01268-v-2015-File011.pdf]

| nt | CTR  | AUG2p18 | AUG1p18 |
|----|------|---------|---------|
| 19 | 0,42 | 0,42    | 0,59    |
| 20 | 0,26 | 0,30    | 0,33    |
| 21 | 0,41 | 0,46    | 0,48    |
| 22 | 0,89 | 0,82    | 0,98    |
| 23 | 0,61 | 0,72    | 0,78    |
| 24 | 0,78 | 0,84    | 0,89    |
| 25 | 0,51 | 0,54    | 0,63    |
| 26 | 0,01 | 0,03    | 0,09    |
| 27 | 0,53 | 0,35    | 0,42    |
| 28 | 0,42 | 0,25    | 0,36    |
| 29 | 0,49 | 0,28    | 0,46    |
| 30 | 0,97 | 0,90    | 0,94    |
| 31 | 0,34 | 0,31    | 0,42    |
| 32 | 0,65 | 0,59    | 0,71    |
| 33 | 0,35 | 0,35    | 0,44    |
| 34 | 0,76 | 0,85    | 0,79    |
| 35 | 0,95 | 0,99    | 1,05    |
| 36 | 0,31 | 0,35    | 0,41    |
| 37 | 0,63 | 0,67    | 0,69    |
| 38 | 0,59 | 0,57    | 0,59    |
| 39 | 0,04 | 0,03    | 0,08    |
| 40 | 0,37 | 0,28    | 0,44    |
| 41 | 0,40 | 0,20    | 0,37    |
| 42 | 0,61 | 0,29    | 0,44    |
| 43 | 0,40 | 0,23    | 0,44    |
| 44 | 0,33 | 0,22    | 0,36    |
| 45 | 0,18 | 0,15    | 0,27    |
| 46 | 0,53 | 0,57    | 0,65    |
| 47 | 0,65 | 0,62    | 0,64    |
| 48 | 0,26 | 0,27    | 0,25    |
| 49 | 0,75 | 1,07    | 1,00    |
| 50 | 1,00 | 1,15    | 0,93    |
| 51 | 1,08 | 1,14    | 1,07    |
| 52 | 0,42 | 0,31    | 0,50    |
| 53 | 0,41 | 0,40    | 0,45    |
| 54 | 0,42 | 0,43    | 0,47    |
| 55 | 0,73 | 0,71    | 0,70    |
| 56 | 0,72 | 0,65    | 0,82    |
| 57 | 0,21 | 0,18    | 0,22    |
| 58 | 0,14 | 0,12    | 0,21    |
| 59 | 0,13 | 0,09    | 0,15    |
| 60 | 0,23 | 0,16    | 0,13    |
| 61 | 0,89 | 0,72    | 0,71    |
| 62 | 0,11 | 0,10    | 0,15    |
| 63 | 0,71 | 0,64    | 0,69    |

|     |      |      |      |
|-----|------|------|------|
| 64  | 0,64 | 0,59 | 0,61 |
| 65  | 0,61 | 0,62 | 0,61 |
| 66  | 0,97 | 0,94 | 0,97 |
| 67  | 0,73 | 0,69 | 0,68 |
| 68  | 1,06 | 1,01 | 1,05 |
| 69  | 0,13 | 0,12 | 0,22 |
| 70  | 0,58 | 0,60 | 0,62 |
| 71  | 0,35 | 0,32 | 0,42 |
| 72  | 0,31 | 0,24 | 0,29 |
| 73  | 0,66 | 0,48 | 0,62 |
| 74  | 0,14 | 0,09 | 0,12 |
| 75  | 0,51 | 0,44 | 0,52 |
| 76  | 0,49 | 0,44 | 0,49 |
| 77  | 0,45 | 0,38 | 0,43 |
| 78  | 0,66 | 0,52 | 0,55 |
| 79  | 0,68 | 0,61 | 0,65 |
| 80  | 0,39 | 0,33 | 0,27 |
| 81  | 0,19 | 0,18 | 0,12 |
| 82  | 0,39 | 0,30 | 0,37 |
| 83  | 0,28 | 0,28 | 0,34 |
| 84  | 0,57 | 0,57 | 0,55 |
| 85  | 0,84 | 0,81 | 0,82 |
| 86  | 1,24 | 1,14 | 1,16 |
| 87  | 0,54 | 0,48 | 0,54 |
| 88  | 0,42 | 0,37 | 0,58 |
| 89  | 0,29 | 0,17 | 0,32 |
| 90  | 0,43 | 0,31 | 0,45 |
| 91  | 0,71 | 0,46 | 0,65 |
| 92  | 0,25 | 0,28 | 0,33 |
| 93  | 0,39 | 0,32 | 0,49 |
| 94  | 0,49 | 0,45 | 0,44 |
| 95  | 0,59 | 0,51 | 0,49 |
| 96  | 0,38 | 0,31 | 0,39 |
| 97  | 0,23 | 0,17 | 0,28 |
| 98  | 0,50 | 0,43 | 0,43 |
| 99  | 0,54 | 0,54 | 0,50 |
| 100 | 0,01 | 0,02 | 0,04 |
| 101 | 0,44 | 0,40 | 0,42 |
| 102 | 0,19 | 0,19 | 0,20 |
| 103 | 0,47 | 0,48 | 0,47 |
| 104 | 0,70 | 0,60 | 0,60 |
| 105 | 0,19 | 0,17 | 0,23 |
| 106 | 0,37 | 0,32 | 0,32 |
| 107 | 1,06 | 1,01 | 0,89 |
| 108 | 0,84 | 0,75 | 0,66 |
| 109 | 0,48 | 0,45 | 0,51 |

|     |      |      |      |
|-----|------|------|------|
| 110 | 0,33 | 0,24 | 0,35 |
| 111 | 0,64 | 0,62 | 0,55 |
| 112 | 0,95 | 0,81 | 0,81 |
| 113 | 0,61 | 0,51 | 0,46 |
| 114 | 0,31 | 0,23 | 0,22 |
| 115 | 0,63 | 0,50 | 0,55 |
| 116 | 0,71 | 0,64 | 0,64 |
| 117 | 0,08 | 0,00 | 0,04 |
| 118 | 0,60 | 0,41 | 0,64 |
| 119 | 0,77 | 0,61 | 0,87 |
| 120 | 0,62 | 0,42 | 0,73 |
| 121 | 0,27 | 0,13 | 0,33 |
| 122 | 0,51 | 0,40 | 0,39 |
| 123 | 1,91 | 1,74 | 1,35 |
| 124 | 1,29 | 1,02 | 0,90 |
| 125 | 0,53 | 0,35 | 0,38 |
| 126 | 0,90 | 0,71 | 0,75 |
| 127 | 0,39 | 0,30 | 0,40 |
| 128 | 0,13 | 0,02 | 0,16 |
| 129 | 0,83 | 0,61 | 0,64 |
| 130 | 0,34 | 0,19 | 0,31 |
| 131 | 0,24 | 0,08 | 0,28 |
| 132 | 0,37 | 0,24 | 0,47 |
| 133 | 0,21 | 0,17 | 0,30 |
| 134 | 0,67 | 0,63 | 0,78 |
| 135 | 0,35 | 0,41 | 0,52 |
| 136 | 0,40 | 0,34 | 0,60 |
| 137 | 0,30 | 0,22 | 0,40 |
| 138 | 0,92 | 1,04 | 1,01 |
| 139 | 0,92 | 0,97 | 1,01 |
| 140 | 0,34 | 0,29 | 0,43 |
| 141 | 1,00 | 0,99 | 1,04 |
| 142 | 1,18 | 1,14 | 1,15 |
| 143 | 0,54 | 0,41 | 0,57 |
| 144 | 0,25 | 0,18 | 0,36 |
| 145 | 0,33 | 0,21 | 0,27 |
| 146 | 0,62 | 0,47 | 0,41 |
| 147 | 0,88 | 0,65 | 0,68 |
| 148 | 0,70 | 0,59 | 0,60 |
| 149 | 0,40 | 0,30 | 0,33 |
| 150 | 1,00 | 0,94 | 0,89 |
| 151 | 0,37 | 0,31 | 0,43 |
| 152 | 0,15 | 0,11 | 0,24 |
| 153 | 0,94 | 0,93 | 0,78 |
| 154 | 0,53 | 0,46 | 0,46 |
| 155 | 0,91 | 0,84 | 0,80 |

|     |      |      |      |
|-----|------|------|------|
| 156 | 0,45 | 0,39 | 0,39 |
| 157 | 0,33 | 0,26 | 0,35 |
| 158 | 0,52 | 0,44 | 0,50 |
| 159 | 0,00 | 0,03 | 0,10 |
| 160 | 0,73 | 0,80 | 0,77 |
| 161 | 0,44 | 0,45 | 0,46 |
| 162 | 0,28 | 0,25 | 0,26 |
| 163 | 0,32 | 0,23 | 0,39 |
| 164 | 0,34 | 0,30 | 0,36 |
| 165 | 0,61 | 0,54 | 0,52 |
| 166 | 1,02 | 0,78 | 0,88 |
| 167 | 0,49 | 0,43 | 0,50 |
| 168 | 0,38 | 0,38 | 0,39 |
| 169 | 0,56 | 0,69 | 0,64 |
| 170 | 0,53 | 0,49 | 0,52 |
| 171 | 0,69 | 0,74 | 0,74 |
| 172 | 0,74 | 0,81 | 0,82 |
| 173 | 0,37 | 0,35 | 0,47 |
| 174 | 0,64 | 0,68 | 0,70 |
| 175 | 0,55 | 0,51 | 0,66 |
| 176 | 0,39 | 0,33 | 0,53 |
| 177 | 0,05 | 0,03 | 0,17 |
| 178 | 0,85 | 1,12 | 0,87 |
| 179 | 0,36 | 0,34 | 0,42 |
| 180 | 0,51 | 0,41 | 0,45 |
| 181 | 0,19 | 0,15 | 0,16 |
| 182 | 0,65 | 0,59 | 0,48 |
| 183 | 0,59 | 0,59 | 0,53 |
| 184 | 0,26 | 0,23 | 0,25 |
| 185 | 0,52 | 0,48 | 0,44 |
| 186 | 0,17 | 0,12 | 0,13 |
| 187 | 0,28 | 0,23 | 0,28 |
| 188 | 0,46 | 0,39 | 0,34 |
| 189 | 0,42 | 0,30 | 0,31 |
| 190 | 0,15 | 0,06 | 0,13 |
| 191 | 0,49 | 0,39 | 0,41 |
| 192 | 0,00 | 0,02 | 0,04 |
| 193 | 0,39 | 0,31 | 0,36 |
| 194 | 0,60 | 0,63 | 0,55 |
| 195 | 0,52 | 0,55 | 0,53 |
| 196 | 0,41 | 0,41 | 0,45 |
| 197 | 0,25 | 0,30 | 0,39 |
| 198 | 0,11 | 0,17 | 0,22 |
| 199 | 0,61 | 0,68 | 0,57 |
| 200 | 0,47 | 0,39 | 0,38 |
| 201 | 0,85 | 0,75 | 0,70 |

|     |      |      |      |
|-----|------|------|------|
| 202 | 0,07 | 0,04 | 0,08 |
| 203 | 0,61 | 0,57 | 0,56 |
| 204 | 0,15 | 0,15 | 0,23 |
| 205 | 0,39 | 0,37 | 0,39 |
| 206 | 0,49 | 0,44 | 0,48 |
| 207 | 0,19 | 0,16 | 0,18 |
| 208 | 0,77 | 0,69 | 0,71 |
| 209 | 0,30 | 0,25 | 0,32 |
| 210 | 0,53 | 0,46 | 0,59 |
| 211 | 0,35 | 0,30 | 0,34 |
| 212 | 0,49 | 0,49 | 0,51 |
| 213 | 0,65 | 0,52 | 0,64 |
| 214 | 0,40 | 0,26 | 0,37 |
| 215 | 0,91 | 0,78 | 0,74 |
| 216 | 0,31 | 0,20 | 0,28 |
| 217 | 0,77 | 0,66 | 0,66 |
| 218 | 0,92 | 0,90 | 0,76 |
| 219 | 0,06 | 0,07 | 0,13 |
| 220 | 0,86 | 0,85 | 0,82 |
| 221 | 0,56 | 0,55 | 0,55 |
| 222 | 0,04 | 0,03 | 0,11 |
| 223 | 0,58 | 0,56 | 0,62 |
| 224 | 0,46 | 0,38 | 0,49 |
| 225 | 0,35 | 0,17 | 0,33 |
| 226 | 0,67 | 0,49 | 0,61 |
| 227 | 0,80 | 0,71 | 0,76 |
| 228 | 0,39 | 0,38 | 0,36 |
| 229 | 0,54 | 0,41 | 0,60 |
| 230 | 0,94 | 0,83 | 0,88 |
| 231 | 0,50 | 0,43 | 0,50 |
| 232 | 0,69 | 0,66 | 0,78 |
| 233 | 0,53 | 0,48 | 0,52 |
| 234 | 0,40 | 0,36 | 0,42 |
| 235 | 0,88 | 0,82 | 0,84 |
| 236 | 0,48 | 0,31 | 0,46 |
| 237 | 0,71 | 0,73 | 0,73 |
| 238 | 0,72 | 0,48 | 0,67 |
| 239 | 0,09 | 0,03 | 0,24 |
| 240 | 0,15 | 0,12 | 0,30 |
| 241 | 0,36 | 0,26 | 0,45 |
| 242 | 0,21 | 0,19 | 0,32 |
| 243 | 0,37 | 0,25 | 0,43 |
| 244 | 0,53 | 0,60 | 0,67 |
| 245 | 0,63 | 0,68 | 0,60 |
| 246 | 1,11 | 1,15 | 0,97 |
| 247 | 0,44 | 0,33 | 0,43 |

|     |       |       |      |
|-----|-------|-------|------|
| 248 | 0,38  | 0,22  | 0,36 |
| 249 | 0,44  | 0,40  | 0,46 |
| 250 | 0,23  | 0,22  | 0,22 |
| 251 | 0,37  | 0,24  | 0,28 |
| 252 | 0,28  | 0,22  | 0,28 |
| 253 | 0,69  | 0,62  | 0,63 |
| 254 | 0,21  | 0,14  | 0,21 |
| 255 | 0,60  | 0,64  | 0,62 |
| 256 | 0,40  | 0,39  | 0,46 |
| 257 | 0,34  | 0,32  | 0,32 |
| 258 | 0,58  | 0,62  | 0,62 |
| 259 | 0,07  | 0,08  | 0,11 |
| 260 | 0,59  | 0,56  | 0,45 |
| 261 | 0,29  | 0,32  | 0,24 |
| 262 | 0,72  | 0,73  | 0,61 |
| 263 | 0,54  | 0,56  | 0,60 |
| 264 | -0,01 | -0,02 | 0,04 |
| 265 | 1,16  | 1,12  | 1,35 |
| 266 | 0,54  | 0,52  | 0,56 |
| 267 | 0,75  | 0,68  | 0,86 |
| 268 | 1,15  | 1,10  | 1,26 |
| 269 | 0,48  | 0,40  | 0,46 |
| 270 | 0,15  | 0,08  | 0,24 |
| 271 | 0,66  | 0,74  | 0,85 |
| 272 | 1,11  | 1,19  | 1,37 |
| 273 | 0,52  | 0,45  | 0,65 |
| 274 | 0,63  | 0,61  | 0,65 |
| 275 | 0,84  | 0,84  | 0,66 |
| 276 | 0,52  | 0,36  | 0,37 |
| 277 | 0,32  | 0,31  | 0,35 |
| 278 | 0,07  | 0,05  | 0,15 |
| 279 | 0,37  | 0,40  | 0,48 |
| 280 | 0,89  | 0,88  | 0,95 |
| 281 | 0,12  | 0,13  | 0,22 |
| 282 | 0,29  | 0,32  | 0,32 |
| 283 | 0,70  | 0,70  | 0,72 |
| 284 | 0,24  | 0,17  | 0,25 |
| 285 | 0,33  | 0,27  | 0,31 |
| 286 | 0,78  | 0,70  | 0,75 |
| 287 | 0,27  | 0,18  | 0,27 |
| 288 | 0,10  | 0,09  | 0,15 |
| 289 | 0,53  | 0,52  | 0,64 |
| 290 | 0,16  | 0,31  | 0,33 |
| 291 | 0,50  | 0,55  | 0,61 |
| 292 | 0,69  | 0,81  | 0,82 |
| 293 | 0,46  | 0,46  | 0,46 |

|     |      |      |      |
|-----|------|------|------|
| 294 | 0,74 | 0,79 | 0,82 |
| 295 | 1,22 | 1,15 | 0,94 |
| 296 | 0,32 | 0,25 | 0,26 |
| 297 | 0,56 | 0,49 | 0,49 |
| 298 | 0,43 | 0,56 | 0,58 |
| 299 | 0,21 | 0,17 | 0,22 |
| 300 | 0,14 | 0,13 | 0,16 |
| 301 | 0,23 | 0,18 | 0,19 |
| 302 | 0,51 | 0,52 | 0,45 |
| 303 | 1,05 | 0,82 | 0,76 |
| 304 | 0,13 | 0,10 | 0,10 |
| 305 | 0,23 | 0,15 | 0,17 |
| 306 | 0,25 | 0,15 | 0,22 |
| 307 | 0,75 | 0,44 | 0,50 |
| 308 | 0,55 | 0,30 | 0,41 |
| 309 | 0,23 | 0,09 | 0,22 |
| 310 | 0,70 | 0,38 | 0,54 |
| 311 | 0,53 | 0,33 | 0,50 |
| 312 | 1,09 | 1,03 | 1,14 |
| 313 | 0,33 | 0,22 | 0,37 |
| 314 | 0,52 | 0,41 | 0,50 |
| 315 | 0,55 | 0,42 | 0,66 |
| 316 | 0,37 | 0,29 | 0,49 |
| 317 | 0,87 | 0,66 | 0,88 |
| 318 | 1,10 | 1,24 | 1,52 |
| 319 | 0,43 | 0,57 | 0,74 |
| 320 | 0,57 | 0,72 | 0,76 |
| 321 | 0,26 | 0,24 | 0,33 |
| 322 | 0,30 | 0,31 | 0,37 |
| 323 | 0,68 | 0,70 | 0,58 |
| 324 | 0,16 | 0,14 | 0,20 |
| 325 | 0,04 | 0,05 | 0,09 |
| 326 | 0,11 | 0,09 | 0,13 |
| 327 | 0,24 | 0,20 | 0,27 |
| 328 | 0,53 | 0,44 | 0,52 |
| 329 | 0,88 | 0,82 | 0,87 |
| 330 | 0,53 | 0,38 | 0,49 |
| 331 | 0,15 | 0,06 | 0,19 |
| 332 | 0,44 | 0,37 | 0,44 |
| 333 | 0,66 | 0,19 | 0,45 |
| 334 | 0,39 | 0,26 | 0,35 |
| 335 | 0,29 | 0,17 | 0,28 |
| 336 | 0,51 | 0,33 | 0,49 |
| 337 | 0,50 | 0,36 | 0,43 |
| 338 | 0,39 | 0,28 | 0,40 |
| 339 | 0,39 | 0,35 | 0,39 |

|     |      |      |      |
|-----|------|------|------|
| 340 | 0,86 | 0,67 | 0,66 |
| 341 | 0,20 | 0,16 | 0,26 |
| 342 | 0,21 | 0,15 | 0,26 |
| 343 | 0,28 | 0,22 | 0,32 |
| 344 | 0,71 | 0,49 | 0,50 |
| 345 | 0,09 | 0,09 | 0,17 |
| 346 | 0,58 | 0,61 | 0,68 |
| 347 | 0,37 | 0,33 | 0,35 |
| 348 | 0,16 | 0,16 | 0,19 |
| 349 | 0,79 | 0,59 | 0,61 |
| 350 | 0,43 | 0,63 | 0,59 |
| 351 | 0,24 | 0,34 | 0,31 |
| 352 | 0,12 | 0,16 | 0,20 |
| 353 | 0,33 | 0,31 | 0,35 |
| 354 | 0,22 | 0,26 | 0,29 |
| 355 | 0,24 | 0,27 | 0,16 |
| 356 | 0,43 | 0,60 | 0,10 |
| 357 | 0,20 | 0,26 | 0,30 |
| 358 | 0,81 | 0,98 | 0,88 |
| 359 | 0,80 | 0,88 | 0,74 |
| 360 | 0,44 | 0,52 | 0,53 |
| 361 | 0,15 | 0,10 | 0,18 |
| 362 | 0,08 | 0,05 | 0,17 |
